# Supplementary material for: Day-to-day variability of [68Ga]Ga-PSMA-11 accumulation in primary prostate cancer: effects on tracer uptake and visual interpretation
Source: Springer Nature journal article supplement (doi:10.1186/s13550-020-00708-z), 2020-10-30
Supplement: MOESM1 [file 18539578]

## Repeatability Coefficient

New (150MBq) and old (100MBq) acquisition protocol

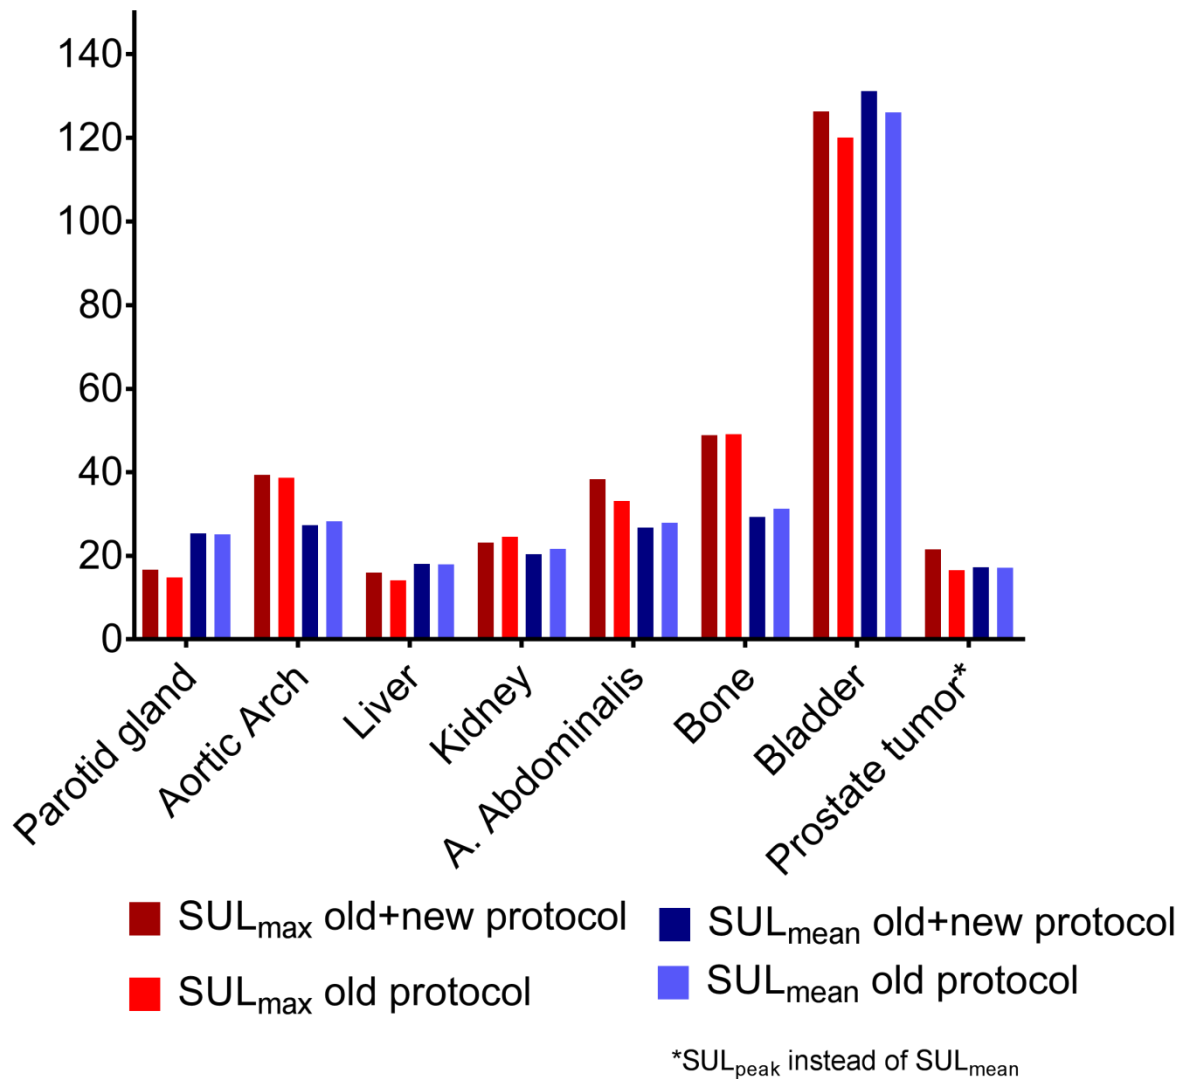

Supplementary Figure 1: Influence of the new protocol (150MBq & 4.5min/bp) on the  $RC_{mean}$  and  $RC_{max}$ , as compared to the old protocol (without protocol violations). Note that the value of the prostate is displayed as  $SUL_{peak}$  instead of  $SUL_{mean}$ .

## Repeatability Coefficient

Influence of acquisition protocol violation

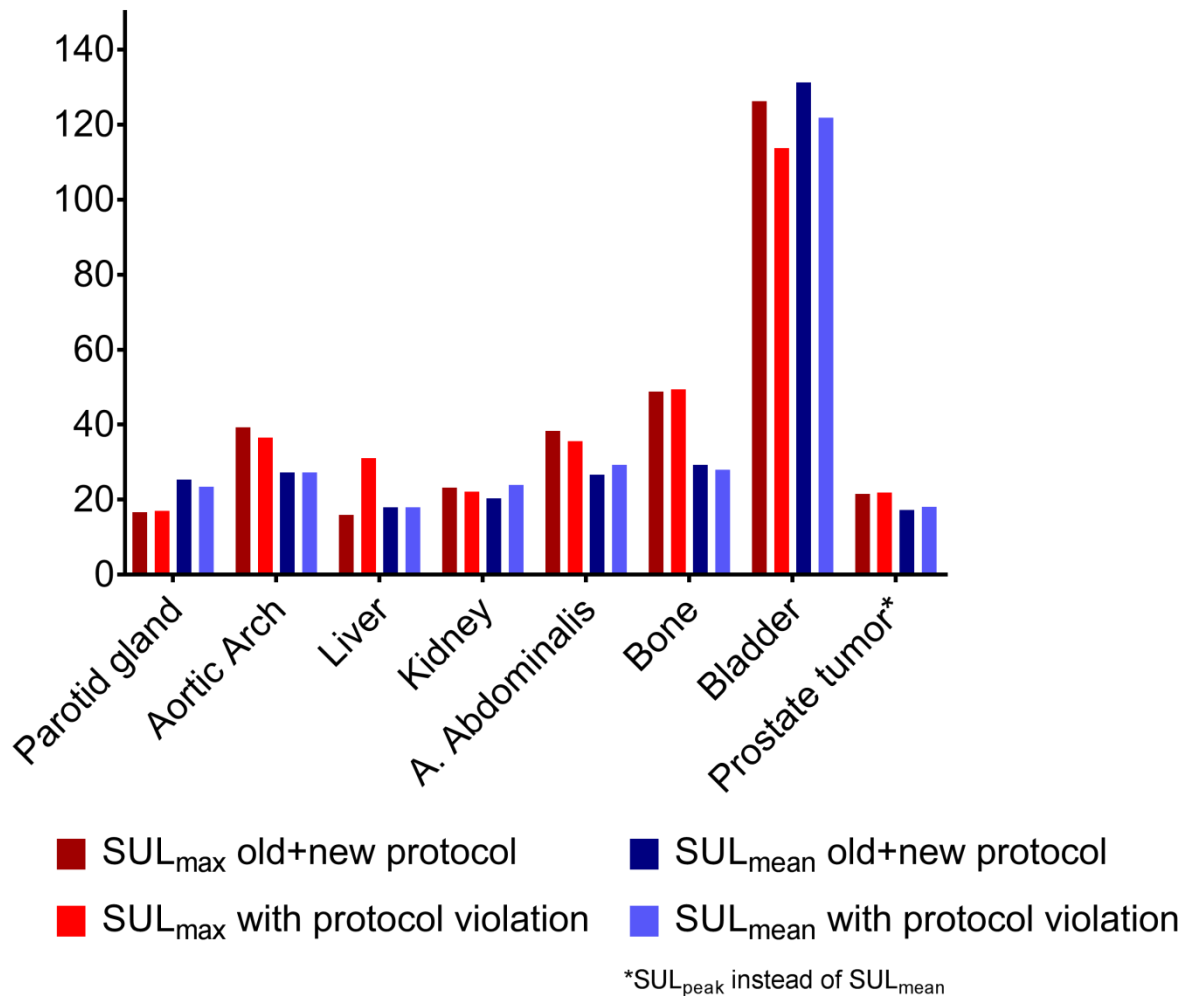

Supplementary Figure 2: The influence of the protocol violations (>10% difference in administered dose and >5min difference in tracer uptake time) on the RC<sub>mean</sub> and RC<sub>max</sub> were investigated by comparing the RC of the old and new protocol combined to the RC of the old+new protocol with the protocol violations included. Note that the value of the prostate is displayed as SUL<sub>peak</sub> instead of SUL<sub>mean</sub>. Note that the large difference in the SUL<sub>max</sub> of the liver is caused by 1 patient, which difference between the scans is very large due to a noisy scan, the RC without this outlier is 18%, more close to the RC without protocol violation (RC 16%).
